# Supplementary material for: Minimizing of the boundary friction coefficient in automotive engines using Al2O3 and TiO2 nanoparticles
Source: Springer Nature journal article supplement (doi:10.1007/s11051-016-3679-4), 2016-12-01
Supplement: MOESM7 [file 11919920]

**Detailed scientific report**

**Paper Title: Minimizing of the boundary friction coefficient in automotive engines using Al2O3 and TiO2 nanoparticles (NANO-D-16-01527R1)**

The work presents a study of the minimizing of the boundary friction coefficient between piston ring and cylinder liner in automotive engines via the formation of self laminating protective films using Al2O3 and TiO2 nanoparticle additives. The test specimens of the ring and liner were fragments from actually fired engine components, to ensure that the materials tested are the same as in the vehicle engine while a using tribometer to mimic the sliding reciprocating motion of the piston ring/liner interface. Nanoparticles were suspended in commercially available engine oil in a concentration of 0.25 wt.% to formulate the nano-lubricants. Al2O3 and TiO2 nanoparticles were prepared to have sizes of 8-12 nm and 10 nm, respectively. The experimental results have shown that the boundary friction coefficient reduced by 35-51% near the top and bottom dead center of the stroke (TDC and BDC) for the Al2O3 and TiO2 nanolubricants, respectively. The wear rate of piston ring was also reduced by 41-30% for the Al2O3 and TiO2 nano-lubricants, respectively, as compared with engine oil without nanoparticles. These findings lead to the conclusion that nanoparticles as nanolubricants can contribute to improving the efficiency and fuel economy of automotive engines.

**Authors:**

Mohamed Kamal Ahmed Ali, Email: [eng.m.kamal@mu.edu.eg](mailto:eng.m.kamal@mu.edu.eg)

Hou Xianjun, Email: [houxj@whut.edu.cn](mailto:houxj@whut.edu.cn)

Ahmed Elagouz,Email: [Ahmedelagouz@mu.edu.eg](mailto:Ahmedelagouz@mu.edu.eg)

F.A. Essa, Email: [fadlessa@eng.kfs.edu.eg](mailto:fadlessa@eng.kfs.edu.eg)

Mohamed A. A. Abdelkareem,Email: [mohamed.a.ali@mu.edu.eg](mailto:mohamed.a.ali@mu.edu.eg)
